# Supplementary material
Source: PubMed Central journal article supplement (PMC6153848)
Supplement: zac010187550s1.pdf [file zac010187550s1.pdf]

**Supplementary Table S1.** Antiseptics and antifungals identified as hits in the primary screen

| <b>Drug Type</b> | <b>Drug Name</b>             | <b>% Inhibition</b> |
|------------------|------------------------------|---------------------|
| Antiseptic       | Thimerosal                   | >90%                |
| Antiseptic       | Clioquinol                   | >90%                |
| Antiseptic       | Thonzonium bromide           | >90%                |
| Antiseptic       | Hexachlorophene              | >90%                |
| Antiseptic       | Chlorhexidine                | >90%                |
| Antiseptic       | Chloroxine                   | >90%                |
| Antiseptic       | Dequalinium dichloride       | >90%                |
| Antiseptic       | Methyl benzethonium chloride | >90%                |
| Antiseptic       | Benzethonium chloride        | >90%                |
| Antiseptic       | Alexidine dihydrochloride    | >90%                |
| Antiseptic       | Merbromin                    | >90%                |
| Antiseptic       | Cycloheximide                | >90%                |
| Antifungal       | Tioconazole                  | >90%                |
| Antifungal       | Ketoconazole                 | >90%                |
| Antifungal       | Ciclopirox ethanolamine      | >90%                |
| Antifungal       | Terconazole                  | >90%                |
| Antifungal       | Voriconazole                 | >90%                |
| Antifungal       | Flucytosine                  | >90%                |

Ebselen

$C_{13}H_9NOSe$

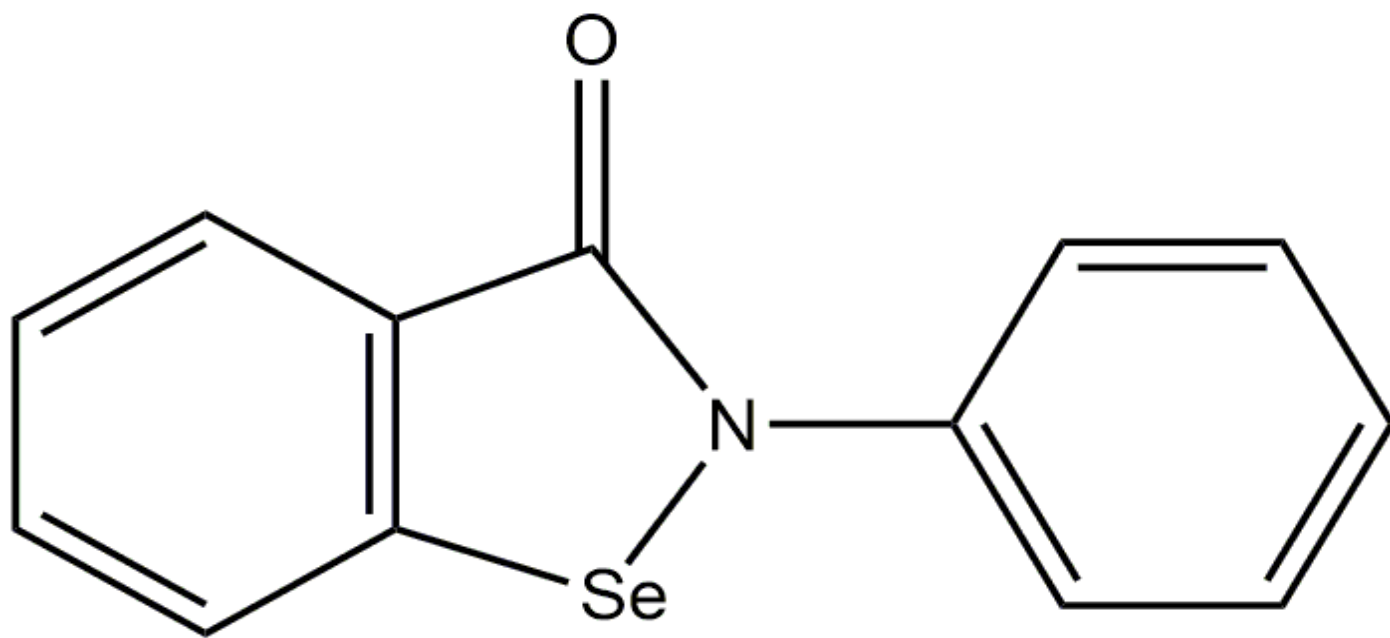

2-Phenyl-1,2-benzisoselenazol-3-(2H)-one

**Supplementary Table S2.** Calculated IC<sub>50</sub> values of ebselen for inhibition of planktonic growth and inhibition of biofilm formation against 10 *C. auris* strains. Values are in µg/ml. Parentheses indicate 95% confidence intervals (CI).

| <i>Candida auris</i> strain | Planktonic IC <sub>50</sub> | Biofilm IC <sub>50</sub> |
|-----------------------------|-----------------------------|--------------------------|
| <b>0381</b>                 | 0.2514 (0.2446-0.2582)      | 6.067 (5.55-6.625)       |
| <b>0382</b>                 | 1.47 (1.266-1.697)          | 8.980 (undetermined)     |
| <b>0383</b>                 | 0.3898 (0.3355-0.4529)      | 9.781 (8.858-10.91)      |
| <b>0384</b>                 | 0.2412 (0.2011-0.2877)      | 7.432 (6.257-8.623)      |
| <b>0385</b>                 | 0.683 (0.5617-0.825)        | 9.164 (undetermined)     |
| <b>0386</b>                 | 0.6048 (0.5139-0.7071)      | 9.425 (undetermined)     |
| <b>0387</b>                 | 1.014 (0.8065-1.272)        | 9.006 (≤9.671)           |
| <b>0388</b>                 | 0.2345 (0.2018-0.2702)      | 8.821 (undetermined)     |
| <b>0389</b>                 | 1.211 (0.7223-1.459)        | 5.864 (undetermined)     |
| <b>0390</b>                 | 0.3777 (0.3391-0.4206)      | 8.050 (undetermined)     |

**A**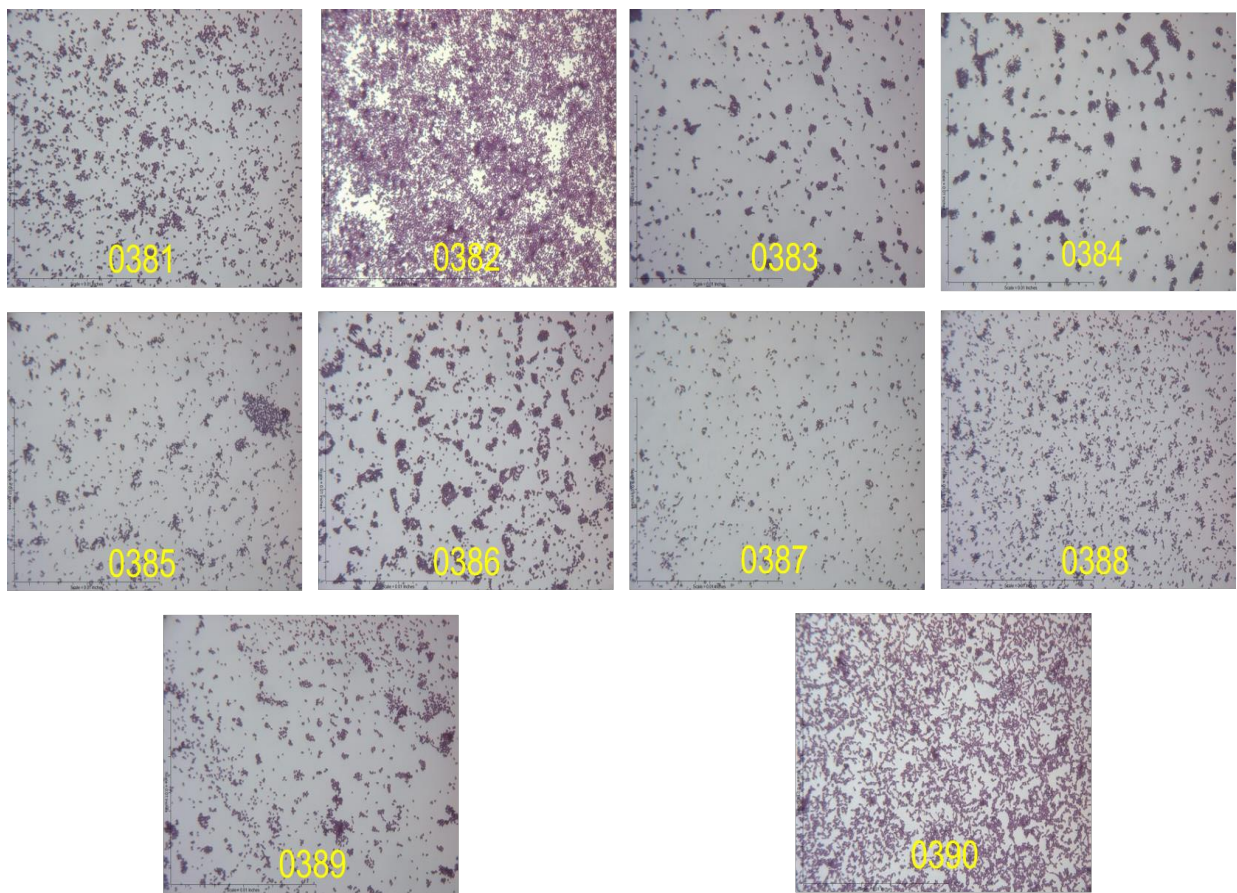**B**

**Inhibition of *C. auris* 0381-0390 Biofilm Formation measured by Crystal Violet**

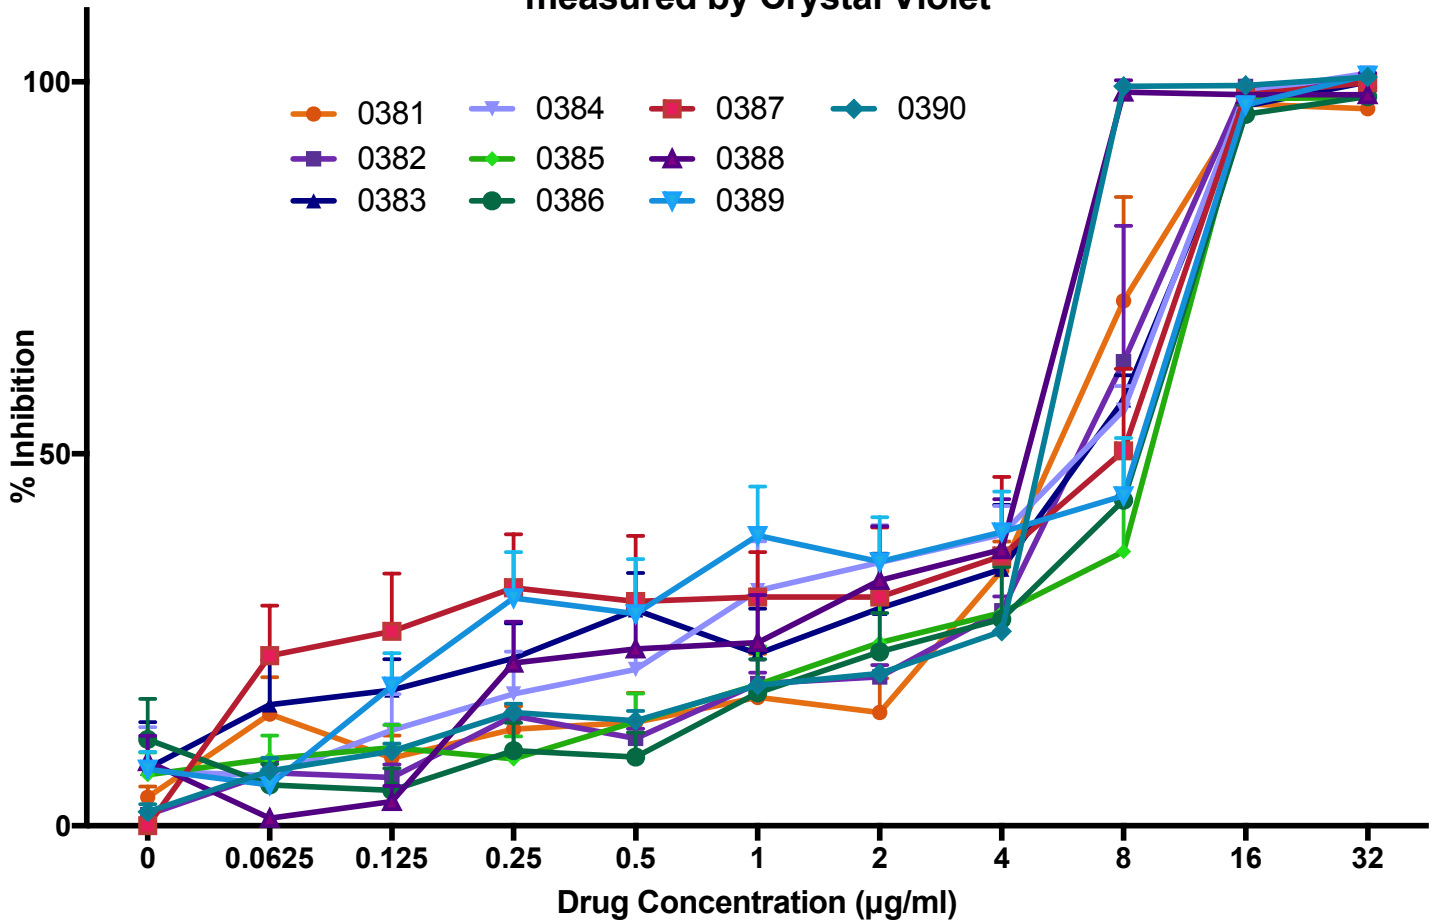

**Supplementary Figure S2.** Effect of ebselen on biofilm formation of 10 *C. auris* strains as revealed by crystal violet staining. A. Microscopic observations of the biofilms formed by the different strains. B. Dose-dependent inhibitory effect of ebselen on biofilm formation. Experiments were performed in two independent plates using duplicate wells in each plate. Bars indicate standard errors.

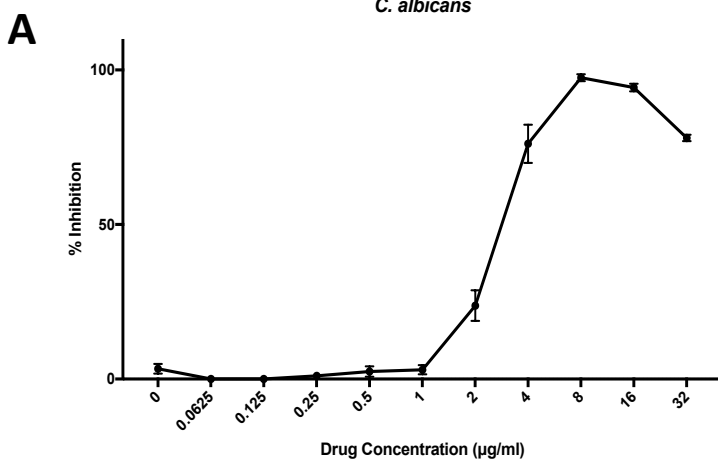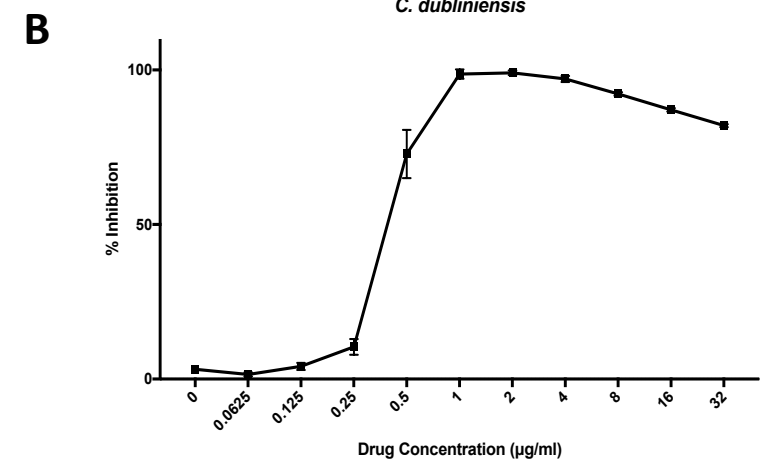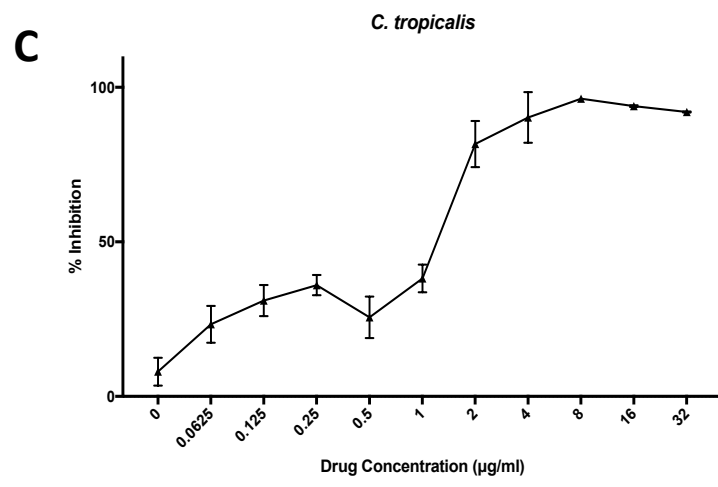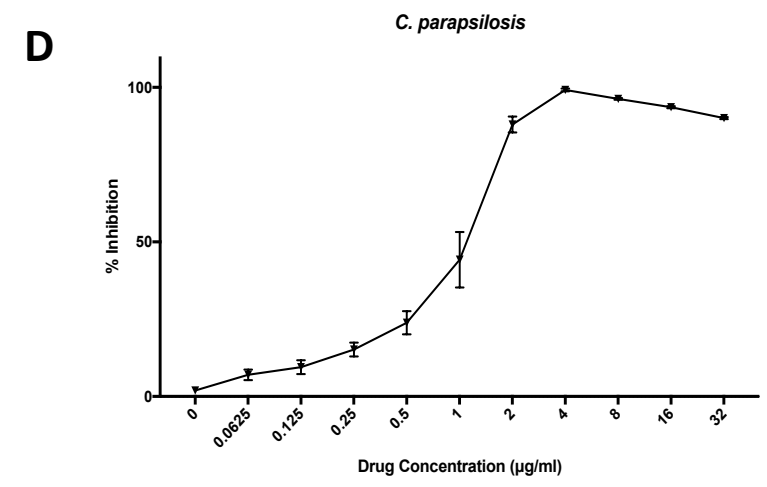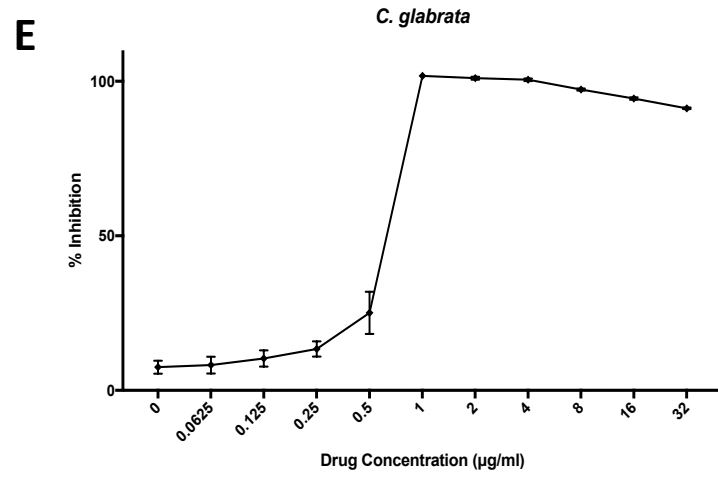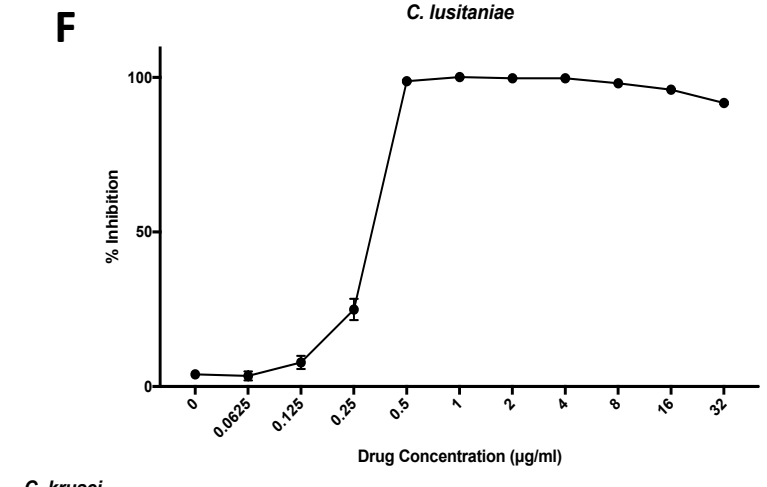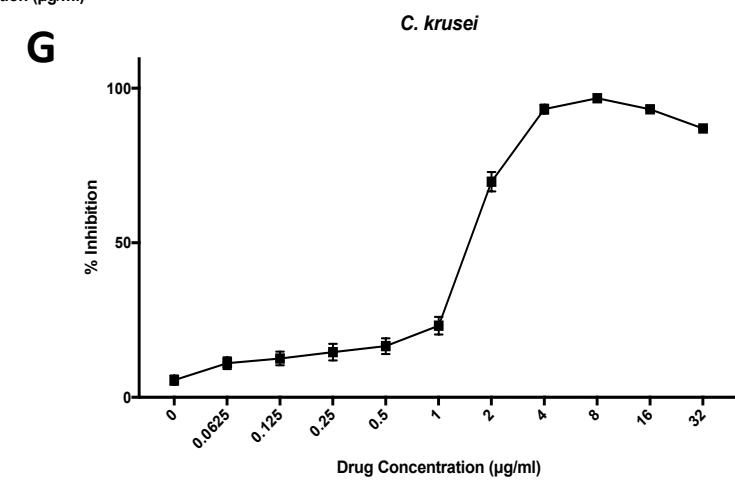

**Supplementary Figure S3.** Inhibitory activity of ebselen against different *Candida* spp. under planktonic growth conditions. Graphs depict inhibition by ebselen of planktonic growth for *C. albicans* and 6 other *Candida* species. Experiments were performed in two independent plates with two duplicate wells per plate. Bars indicate standard errors.

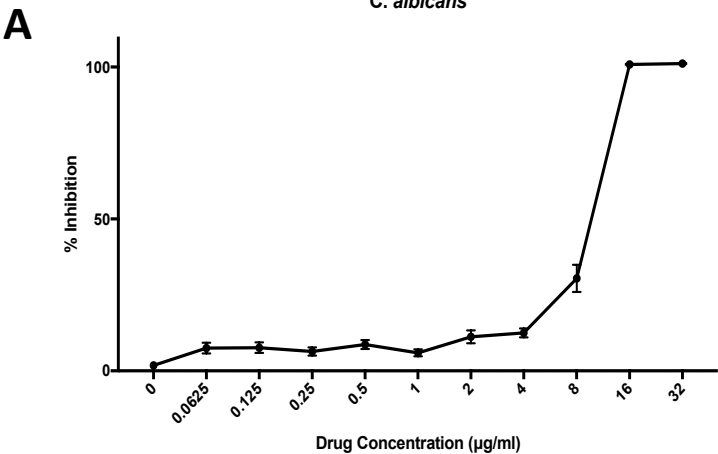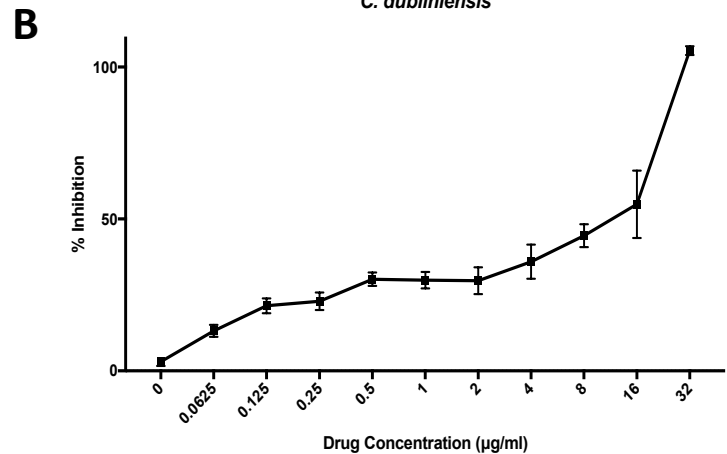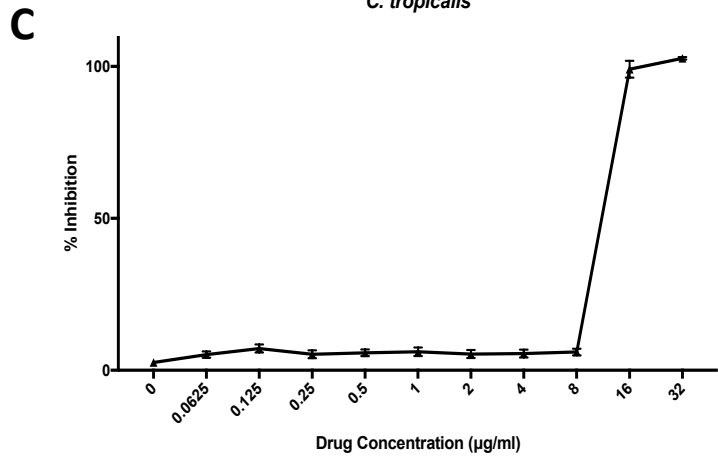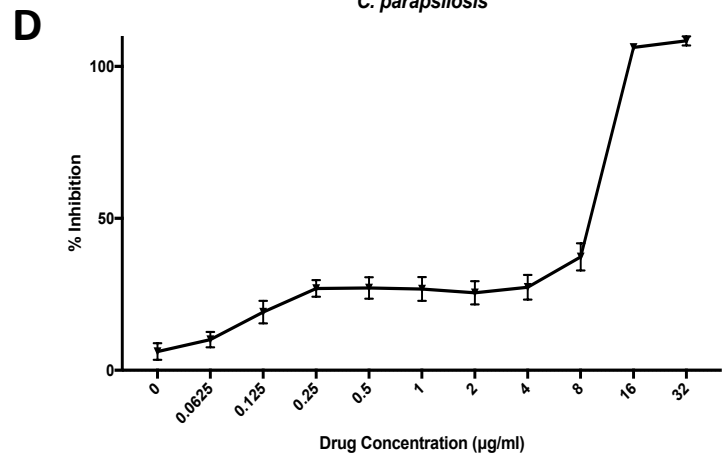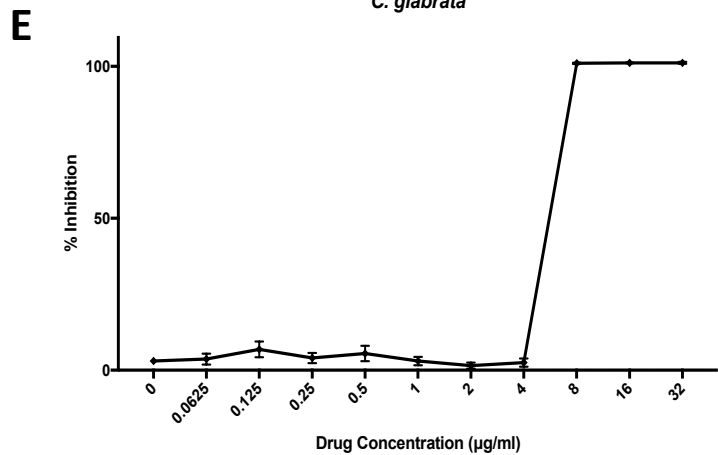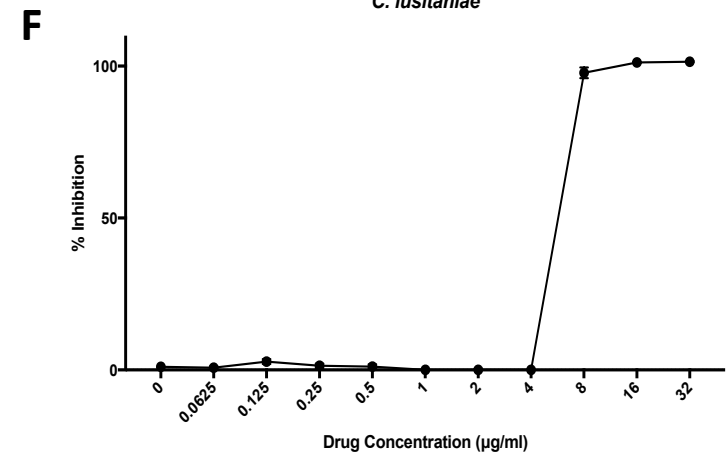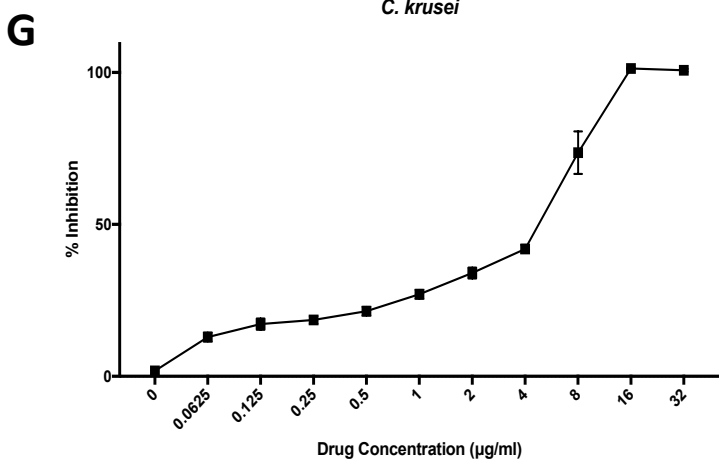

**Supplementary Figure S4.** Inhibitory activity of ebselen against different *Candida* spp. under biofilm growing conditions. Graphs depict ebselen inhibition of biofilm formation by *C. albicans* and 6 other *Candida* species. Experiments were performed in two independent plates with two duplicate wells per plate. Bars indicate standard errors.

**Supplementary Table S3.** Results of combination testing of ebselen with clinically-used antifungals against *C. auris* 0390.

|                                | <b>Inhibition of planktonic growth</b> | <b>Inhibition of biofilm formation</b> |
|--------------------------------|----------------------------------------|----------------------------------------|
| <b>Ebselen-Fluconazole</b>     | Indifference<br>(2.02)                 | Indifference<br>(1.02)                 |
| <b>Ebselen-Caspofungin</b>     | Indifference<br>(2.50)                 | Indifference<br>(1.02)                 |
| <b>Ebselen- Amphotericin B</b> | Indifference<br>(2.25)                 | Indifference<br>(1.01)                 |

Note: Parentheses indicate the calculated FIC index value for each combination.

**Supplementary Table S4.** Results of combination testing of ebselen with clinically-used antifungals against *C. albicans* SC5314.

|                                 | <b>Inhibition of planktonic growth</b> | <b>Inhibition of biofilm formation</b> |
|---------------------------------|----------------------------------------|----------------------------------------|
| <b>Ebselen – Fluconazole</b>    | Synergy<br>(0.27)                      | Indifference<br>(0.62)                 |
| <b>Ebselen – Caspofungin</b>    | Indifference<br>(0.53)                 | Indifference<br>(1.00)                 |
| <b>Ebselen – Amphotericin B</b> | Indifference<br>(1.03)                 | Indifference<br>(1.00)                 |

Note: Parentheses indicate the calculated FIC index value for each combination.
